# Supplementary material
Source: publisher figshare collection journal article supplement (https://rs.figshare.com/ndownloader/files/12535856)
Supplement: Supplementary file 1 [file 12535856]

## Sheet: Fig 1A
		Ammonia excretion rate - umol/g/h
Species	Fish ID	Control	Emersion	Recovery
K. marmoratus
	1	0.653061	0.223881	0.907914
	2	1.56116	0.196286	0.836601
	3	1.83243	0.151809	0.225035
	4	1.71983	0.194175	1.46093
	5	2.56364	0.19833	1.65319
	6	1.58795	0.411475	1.94726
R. cylindraceus
	1	0.823232	0.236018	0.830784
	2	0.351412	0.284476	1.12595
	3	0.551317	0.268502	1.25206
	4	1.16255	0.363909	1.07436
	5	0.908143	0.453042	1.01008
	6	0.625123	0.235807	0.53582
A. hartii
	1	0.367464	0.156512	1.21467
	2	2.10526	0.194538	1.36452
	3	1.87657	0.231999	0.914125
	4	1.47543	0.295842	1.26206
	5	0.858294	0.217979	0.61657
	6	0.860532	0.317987	3.73225
C. hildebrandi
	1	1.06658	0.101043	1.56805
	2	0.636787	0.152197	1.4768
	3	0.720676	0.104312	1.4662
	4	0.923661	0.169499	1.99215
	5	2.09802	0.131244	1.13205
	6	0.892473	0.154421	1.37366
F. gardneri
	1	0.427807	0.218731	2.01203
	2	0.867574	0.0948547	1.87396
	3	0.739841	0.109811	1.43183
	4	0.911559	0.0840445	1.49664
	5	0.760426	0.101062	1.13661
	6	1.03973	0.107796	1.921
A. lineatus
	1	1.33314	0.364106	0.129014
	2	0.758824	0.211438	0.235294
	3	1.08247	0.34579	2.34278
	4	0.845666	0.192624	1.37949
	5	0.783784	0.26977	2.22523
	6	0.623077	0.238889	1.93077

## Sheet: Fig 1B
		Urea excretion rate - umol/g/h
Species	Fish ID	Control	Emersion	Recovery
K. marmoratus
	1	0.865073	0.45977	0.576715
	2	0.703178	0.522876	0.784314
	3	0.581987	0.982912	0.532888
	4	0.301306	0.399881	0.390897
	5	1.12774	0.351816	1.18557
	6	0.167867	0.878972	0.012
R. cylindraceus
	1	0.504414	0.523763	0.240197
	2	0.66144	0.741269	0.935139
	3	0.0819331	0.550772	0.540758
	4	0.943446	1.16727	0.382478
	5	0.412599	1.00039	0.44207
	6	0.2506	0.416739	0.2506
A. hartii
	1	0.471579	0.517427	0.143158
	2	0	0.54191	0.0116959
	3	0.0398671	0.531561	0.0531561
	4	0.0299625	0.744902	0.404494
	5	0.208092	0.686577	0.141141
	6	0.243408	0.50124	0.227181
C. hildebrandi
	1	0.247922	0.329516	0.194571
	2	0.312161	0.299816	0.0828167
	3	0.336063	0.3125	0.0179713
	4	0.269162	0.310705	0.0942589
	5	0.179786	0.402588	0.0161789
	6	0.0857299	0.315898	0.0437397
F. gardneri
	1	0.15227	0.229614	0.413306
	2	0.124225	0.130499	0.395261
	3	0.287477	0.297459	0.227586
	4	0.231424	0.132075	0.262981
	5	0.926884	0.12339	0.0961861
	6	0.364768	0.218022	0.0880475
A. lineatus
	1	0.258028	0.750191	0.0460092
	2	0.161765	0.449346	0.0388235
	3	0.502577	0.469287	0.0373196
	4	0.211416	0.335477	0.0778436
	5	0.202703	0.422923	0.0175676
	6	0.153846	0.310897	0.153846

## Sheet: Fig 1C
	Species
	K. marmoratus	Fish ID	NH3 volatilization rate - umol/g/h	Ammonia excretion to substrate - umol/g/h
		1	0.359312	0.0736995
		2	0.143525	0.206441
		3	0.263327	0.229438
		4	0.595274	0.3004
		5	0.181593	0.205864
		6	0.336611	0.339091
	R. cylindraceus
		1	0.169205	0.058246
		2	0.177512	0.0428065
		3	0.308182	0.0679988
		4	0.170589	0.0628127
		5	0.246884	0.118343
		6	0.581893	0.0842322
	A. hartii
		1	0.271204	0.00620297
		2	0.415174	0.0940854
		3	0.425531	0.0357734
		4	0.337822	0.0521129
		5	0.477664	0.055682
		6	0.371042	0.0545808
	C. hildebrandi
		1	0.231736	0.043848
		2	0.228439	0.119011
		3	0.657899	0.0626139
		4	0.439147	0.0252075
		5	0.568762	0.0362336
		6	0.526576	0.125619
	F. gardneri
		1	0.170338	0.108524
		2	0.259909	0.0249513
		3	0.270303	0.06113
		4	0.274032	0.0348065
		5	0.250586	0.0587511
		6	0.326036	0.067273
	A. lineatus
		1	0.329425	0.1308
		2	0.366603	0.0412005
		3	0.234973	0.0796608
		4	0.614214	0.0855072
		5	1.02917	0.0567117
		6	0.339132	0.0664753

## Sheet: Fig S1A
	Voluntary emersion
Individual	Species	Lighting	% time out of water
1	Hartii	Day	27.2176
2	Hartii	Day	26.1173
3	Hartii	Day	51.7176
4	Hartii	Day	30.6898
5	Hartii	Day	43.4722
6	Hartii	Day	32.6528
7	Hartii	Day	35.8765
8	Hartii	Day	15.2454
9	Hartii	Day	15.9815
10	Hartii	Day	17.733
11	Hartii	Day	52.0355
12	Hartii	Day	32.1512
1	Hartii	Night	34.8657
2	Hartii	Night	53.2083
3	Hartii	Night	28.9861
4	Hartii	Night	25.7994
5	Hartii	Night	48.6759
6	Hartii	Night	30.5756
7	Hartii	Night	17.1512
8	Hartii	Night	14.8025
9	Hartii	Night	11.4306
10	Hartii	Night	5.69753
11	Hartii	Night	15.5478
12	Hartii	Night	26.5216
1	Cylindraceus	Day	9.38117
2	Cylindraceus	Day	5.80556
3	Cylindraceus	Day	5.73148
4	Cylindraceus	Day	1.78241
5	Cylindraceus	Day	0.364198
6	Cylindraceus	Day	6.8534
7	Cylindraceus	Day	15.9799
8	Cylindraceus	Day	9.81019
9	Cylindraceus	Day	23.8333
10	Cylindraceus	Day	9.70216
11	Cylindraceus	Day	9.62346
12	Cylindraceus	Day	4.85648
1	Cylindraceus	Night	0.87037
2	Cylindraceus	Night	0.449074
3	Cylindraceus	Night	0.396605
4	Cylindraceus	Night	1.71142
5	Cylindraceus	Night	1.1821
6	Cylindraceus	Night	0.243827
7	Cylindraceus	Night	3.12809
8	Cylindraceus	Night	2.12037
9	Cylindraceus	Night	1.02469
10	Cylindraceus	Night	0.42284
11	Cylindraceus	Night	1.36574
12	Cylindraceus	Night	2.33179
1	Hildebrandi	Day	3.41975
2	Hildebrandi	Day	5.51389
3	Hildebrandi	Day	9.22531
4	Hildebrandi	Day	1.71296
5	Hildebrandi	Day	6.89815
6	Hildebrandi	Day	2.77932
7	Hildebrandi	Day	1.62809
8	Hildebrandi	Day	5.90432
9	Hildebrandi	Day	7.45988
10	Hildebrandi	Day	4.33179
11	Hildebrandi	Day	0.521605
12	Hildebrandi	Day	10.9429
1	Hildebrandi	Night	36.5664
2	Hildebrandi	Night	45.2006
3	Hildebrandi	Night	37.2022
4	Hildebrandi	Night	36.4012
5	Hildebrandi	Night	30.7577
6	Hildebrandi	Night	28.3102
7	Hildebrandi	Night	32.5664
8	Hildebrandi	Night	20.6111
9	Hildebrandi	Night	25.2299
10	Hildebrandi	Night	45.1574
11	Hildebrandi	Night	22.1358
12	Hildebrandi	Night	36.2762
1	FW KMAR	Day	0
2	FW KMAR	Day	0
3	FW KMAR	Day	0
4	FW KMAR	Day	0.0679012
5	FW KMAR	Day	0.00617284
6	FW KMAR	Day	0
7	FW KMAR	Day	0.087963
8	FW KMAR	Day	0.00771605
9	FW KMAR	Day	0.066358
10	FW KMAR	Day	0.155864
11	FW KMAR	Day	0
12	FW KMAR	Day	0
1	FW KMAR	Night	0.106481
2	FW KMAR	Night	1.56481
3	FW KMAR	Night	3.05247
4	FW KMAR	Night	1.1034
5	FW KMAR	Night	2.60494
6	FW KMAR	Night	14.3735
7	FW KMAR	Night	0
8	FW KMAR	Night	0.416667
9	FW KMAR	Night	0
10	FW KMAR	Night	0.356481
11	FW KMAR	Night	0.0123457
12	FW KMAR	Night	0.615741
1	Lineatus	Day	1.13272
2	Lineatus	Day	0
3	Lineatus	Day	1.57253
4	Lineatus	Day	3.03241
5	Lineatus	Day	1.23148
6	Lineatus	Day	0.157407
7	Lineatus	Day	0.415123
8	Lineatus	Day	0.0694444
9	Lineatus	Day	2.18673
10	Lineatus	Day	0.895062
11	Lineatus	Day	0
12	Lineatus	Day	0.310185
1	Lineatus	Night	0
2	Lineatus	Night	0
3	Lineatus	Night	0.609568
4	Lineatus	Night	0
5	Lineatus	Night	0
6	Lineatus	Night	0
7	Lineatus	Night	0
8	Lineatus	Night	0
9	Lineatus	Night	0
10	Lineatus	Night	0
11	Lineatus	Night	0
12	Lineatus	Night	0.279321
1	SW KMAR	Day	2.83179
2	SW KMAR	Day	4.21914
3	SW KMAR	Day	1.26852
4	SW KMAR	Day	0.83179
5	SW KMAR	Day	0
6	SW KMAR	Day	1.89969
7	SW KMAR	Day	0.37963
8	SW KMAR	Day	0
9	SW KMAR	Day	8.04475
10	SW KMAR	Day	0.57716
11	SW KMAR	Day	0.209877
12	SW KMAR	Day	0
1	SW KMAR	Night	18.4074
2	SW KMAR	Night	0
3	SW KMAR	Night	4.7716
4	SW KMAR	Night	1.28704
5	SW KMAR	Night	3.43519
6	SW KMAR	Night	0
7	SW KMAR	Night	1.85957
8	SW KMAR	Night	1.60802
9	SW KMAR	Night	10.4938
10	SW KMAR	Night	0.262346
11	SW KMAR	Night	6.26543
12	SW KMAR	Night	0.404321
1	Gardneri	Day	2.62274
2	Gardneri	Day	0
3	Gardneri	Day	0
4	Gardneri	Day	0.589354
5	Gardneri	Day	1.98457
6	Gardneri	Day	5.03083
7	Gardneri	Day	0
8	Gardneri	Day	0
9	Gardneri	Day	0.0154321
10	Gardneri	Day	0
11	Gardneri	Day	0
12	Gardneri	Day	2.20988
1	Gardneri	Night	0.0601852
2	Gardneri	Night	0
3	Gardneri	Night	0.0231481
4	Gardneri	Night	1.38272
5	Gardneri	Night	0
6	Gardneri	Night	0
7	Gardneri	Night	0
8	Gardneri	Night	0
9	Gardneri	Night	0
10	Gardneri	Night	0
11	Gardneri	Night	0
12	Gardneri	Night	0.00154321

## Sheet: Fig S1B
Species	Fish ID	Temperature at emersion		Fish ID	Dissolved oxygen (%) at emersion
		*note: LOE indicates a 'loss of equilibrium'
K. marmoratus
	1	38		1	0.013
	2	38.4		2	0.005
	3	39.2		3	0.023
	4	38.6		4	0
	5	39.1		5	0
	6	LOE		6	0.004
	7	LOE		7	0.001
				8	0.021
R. cylindraceus
	1	38.6		1	Passed Out
	2	38.6		2	Passed Out
	3	38.9		3	0
	4	39		4	0
	5	39.6		5	0
	6	39		6	0
	7	LOE		7	0
				8	0.001
A. hartii
	1	39.4		1	0.021
	2	38.6		2	0.025
	3	39.5		3	0
	4	38.5		4	0.03
	5	38.7		5	0.023
	6	37.7		6	0.008
	7	38		7	0.038
C. hildebrandi
	1	39.9		1	0.043
	2	40.2		2	0.027
	3	38.5		3	0.007
	4	38.8		4	0.039
	5	37.5		5	0.01
	6	39.9		6	0.087
	7	39.3		7	0.066
F. gardneri
	1	LOE		1	0.029
	2	LOE		2	0.021
	3	LOE		3	0.03
	4	LOE		4	0.021
	5	LOE		5	0.033
	6	LOE		6	0.023
	7	LOE		7	0.027
				8	0.063
A. lineatus
	1	39.5		1	0.05
	2	39.1		2	0.025
	3	39.5		3	0.049
	4	39.6		4	0.052
	5	39.8		5	0.095
	6	LOE		6	0.04
	7	LOE		7	0.053
				8	0.061

## Sheet: Fig S2
			O2 consumption rate - umol/g/h
	Species
	K. marmoratus	Fish ID	Water	Air
		1	9.7753	10.6646
		2	10.1624	12.9998
		3	9.21391	13.0414
		4	11.2667	13.3093
		5	9.58655	11.225
		6	8.91475	9.78032
	R. cylindraceus
		1	7.12728	6.7383
		2	4.65232	6.55478
		3	5.37976	7.23773
		4	6.61437	7.88127
		5	5.55757	8.95971
		6	6.20596	8.03117
	A. hartii
		1	5.50662	7.141
		2	4.87774	9.23267
		3	7.35428	8.61978
		4	4.0131	8.69599
		5	5.70246	15.2252
		6	5.44298	10.3105
	C. hildebrandi
		1	7.84993	7.79131
		2	7.08395	12.6086
		3	5.48693	12.3748
		4	6.71883	7.77871
		5	6.68008	16.5041
		6	5.90781	9.36331
	F. gardneri
		1	9.8848	10.5648
		2	6.2183	9.17539
		3	4.74723	7.38844
		4	13.433	15.6319
		5	8.47241	12.9823
		6	8.16122	10.3992
	A. lineatus
		1	6.46052	7.84434
		2	9.64116	8.92798
		3	8.47393	9.76602
		4	7.68221	9.5349
		5	8.36964	8.75358
		6	7.58002	9.00173

## Sheet: Masses
Fig 1A,B - Ammonia and urea excretion				Fig 1C - Ammonia volatilzation				Fig S1A - Voluntary emersion				Fig S1B - Emersion at temperature				Fig S1B - Emersion at low dissolved oxygen				Fig S2 - Metabolic rate (Air, water)
Species	Fish ID	Mass (g)		Species	Fish ID	Mass (g)		Species	Fish ID	Mass (g)		Species	Fish ID	Mass (g)		Species	Fish ID	Mass (g)		Species	Fish ID	Mass (g)
K. marmoratus	1	0.1435		K. marmoratus	1	0.1455		K. marmoratus	1	0.1632		K. marmoratus	1	0.181		K. marmoratus	1	0.222		K. marmoratus	1	0.14
	2	0.153			2	0.1342			2	0.1707			2	0.173			2	0.153			2	0.13
	3	0.1422			3	0.206			3	0.1359			3	0.159			3	0.169			3	0.1548
	4	0.1236			4	0.1565			4	0.0922			4	0.242			4	0.216			4	0.1518
	5	0.1431			5	0.1775			5	0.1589			5	0.2			5	0.218			5	0.1462
	6	0.0986			6	0.1615			6	0.1783			6	0.185			6	0.209			6	0.1555
R. cylindraceus	1	0.3276		R. cylindraceus	1	0.5652			7	0.0799			7	0.191			7	0.171		R. cylindraceus	1	0.1728
	2	0.1725			2	0.6237			8	0.0965		R. cylindraceus	1	0.208			8	0.197			2	0.2042
	3	0.2401			3	0.483			9	0.141			2	0.102		R. cylindraceus	1	0.245			3	0.2
	4	0.1543			4	0.5327			10	0.1688			3	0.149			2	0.107			4	0.141
	5	0.1335			5	0.5915			11	0.1592			4	0.216			3	0.123			5	0.1219
	6	0.2355			6	0.4044			12	0.1586			5	0.205			4	0.166			6	0.1466
A. hartii	1	0.475		A. hartii	1	1.1996		R. cylindraceus	1	0.424			6	0.132			5	0.183		A. hartii	1	0.2427
	2	0.342			2	0.812			2	0.6015			7	0.158			6	0.305			2	0.1625
	3	0.301			3	0.6419			3	0.5605			8	0.146			7	0.178			3	0.1685
	4	0.267			4	0.8858			4	0.3701		A. hartii	1	0.821			8	0.262			4	0.1791
	5	0.346			5	0.5551			5	0.3031			2	0.888		A. hartii	1	0.994			5	0.1206
	6	0.2465			6	0.4143			6	0.5545			3	1.283			2	0.99			6	0.1436
C. hildebrandi	1	0.6481		C. hildebrandi	1	0.497			7	0.2993			4	0.688			3	0.96		C. hildebrandi	1	0.1961
	2	0.4613			2	0.8466			8	0.4147			5	0.729			4	0.399			2	0.2873
	3	0.4527			3	0.4505			9	0.3442			6	0.575			5	0.527			3	0.2352
	4	0.3884			4	0.4753			10	0.5902			7	0.614			6	0.55			4	0.157
	5	0.3688			5	0.4513			11	0.2987		C. hildebrandi	1	0.34			7	0.488			5	0.1893
	6	0.465			6	0.4143			12	0.3961			2	0.645		C. hildebrandi	1	0.392			6	0.1704
F. gardneri	1	0.187		F. gardneri	1	0.9039		A. hartii	1	1.1508			3	0.56			2	1.097		F. gardneri	1	0.217
	2	0.3602			2	0.855			2	0.7295			4	0.395			3	0.395			2	0.2064
	3	0.3396			3	0.7634			3	1.24			5	0.462			4	0.576			3	0.1917
	4	0.3867			4	0.8008			4	0.7234			6	0.548			5	0.453			4	0.1164
	5	0.4652			5	1.1169			5	0.8606			7	0.536			6	0.897			5	0.1206
	6	0.3234			6	0.7607			6	0.2441			8	0.891			7	0.625			6	0.1436
A. lineatus	1	0.1744		A. lineatus	1	0.3927			7	0.2222		F. gardneri	1	0.473		F. gardneri	1	0.737		A. lineatus	1	0.2291
	2	0.255			2	0.5856			8	0.745			2	0.222			2	0.752			2	0.1835
	3	0.194			3	0.483			9	0.2607			3	0.702			3	0.91			3	0.1844
	4	0.2838			4	0.2959			10	0.3945			4	0.339			4	0.802			4	0.22196
	5	0.1665			5	0.2032			11	0.6608			5	0.548			5	0.559			5	0.2002
	6	0.195			6	0.2937			12	0.2553			6	0.322			6	0.915			6	0.1436
								C. hildebrandi	1	0.647			7	0.475			7	0.755
									2	1.3519			8	0.372			8	0.751
									3	0.466		A. lineatus	1	0.233		A. lineatus	1	0.361
									4	1.0072			2	0.292			2	0.262
									5	0.8137			3	0.373			3	0.34
									6	0.6326			4	0.207			4	0.288
									7	0.7041			5	2.29			5	0.286
									8	0.7735			6	0.191			6	0.15
									9	0.9767			7	0.335			7	0.155
									10	1.2175							8	0.368
									11	0.6163
									12	0.353
								F. gardneri	1	0.7465
									2	0.3656
									3	0.4645
									4	0.3508
									5	0.7011
									6	0.3469
									7	0.3511
									8	0.485
									9	0.4829
									10	0.3165
									11	0.3336
									12	0.2151
								A. lineatus	1	0.2774
									2	0.3405
									3	0.3255
									4	0.4966
									5	0.152
									6	0.3804
									7	0.3327
									8	0.1856
									9	0.2904
									10	0.2616
									11	0.1958
									12	0.3528
